# Supplementary material
Source: publisher figshare collection journal article supplement (https://sage.figshare.com/ndownloader/files/16770044)
Supplement: Supplementary file 1 [file 16770044]

## Sheet: Info
			Appendix: Radiocarbon and climate proxy data
			This document contains all data (raw and processed) presented in the paper that has not been previously published.
			Jørgensen, E. K. and F. Riede 2019. "Convergent catastrophes and the termination of the Arctic Norwegian Stone Age: A multi-proxy assessment of the demographic and adaptive responses of mid-Holocene collectors to biophysical forcing"
			Info: Gressbakken SPD
			Exclusively dated, morphologically distinct, Norwegian Gressbakken houses
			107 dates
			Info: Interior SPD
			115 dates, 88 bins (200 year brackets)

## Sheet: Gressbakken Radiocarbon data
Site name	Region	StructureID	DateID	14C BP	Deviation (+/-)	Sample material	Species determination of sample	Site coordinates (EU89 - geografiske grader) LAT	Site coordinates (EU89 - geografiske grader) LONG	Structure ID	Context	Comments	68.2 % MAX date cal.BC/AD	68.2 % MIN date cal.BC/AD	95.4 % MAX date cal.BC	95.4 % MIN date cal.BC	Median	Reference	Cf.
Advik	Nesseby	Advik, Hus a	T2165	4150	100	Bone/Antler	N/A	70° 4'31.77"N	28°47'16.67"Ø	House a	Midden	Already MRC by lab. Probably using 440 marine offset						Helskog 1980:53	Renouf 1989:114
Advik	Nesseby	Advik, Hus a	T232	6050	250	Charcoal	N/A	70° 4'31.77"N	28°47'16.67"Ø	House a	Fireplace	Also given by LOK-ID Nyelv 3						Helskog 1980:53	Renouf 1989:114
Advik	Nesseby	Advik, Hus b	T2058B	3630	80	Shell	Marine	70° 4'31.77"N	28°47'16.67"Ø	House b	Midden	Already MRC by lab. Probably using 440 marine offset						Helskog 1980:53	Renouf 1989:114
Advik	Nesseby	Advik, Hus f	T1816	4350	130	Charcoal	Furu	70° 4'31.77"N	28°47'16.67"Ø	House f	Midden	Also given by LOK-ID Nyelv 3						Helskog 1980:53	Renouf 1989:114
Advik	Nesseby	Advik, Hus f	T197	4800	150	Charcoal	N/A	70° 4'31.77"N	28°47'16.67"Ø	House f (4), Prøve nr.7, Advik, mødding ved House 4 (f), Advik, Nesseby, Finnmark	Midden	Also given by LOK-ID Nyelv 3						Helskog 1980:53	Renouf 1989:114
Advik	Nesseby	Advik, Hus h	T2054	4780	80	Shell	Marine	70° 4'31.77"N	28°47'16.67"Ø	House h	Midden	Already MRC by lab. Probably using 440 marine offset						Helskog 1980:53	Renouf 1989:114
Advik	Nesseby	Advik, Hus k	T2057	4390	70	Shell	Marine	70° 4'31.77"N	28°47'16.67"Ø	House k	Midden	Already MRC by lab. Probably using 440 marine offset						Helskog 1980:53	Renouf 1989:114
Advik	Nesseby	Advik, Hus n	T2056	3730	90	Shell	Marine	70° 4'31.77"N	28°47'16.67"Ø	House n	Midden	Already MRC by lab. Probably using 440 marine offset						Helskog 1980:53	Renouf 1989:114
Advik	Nesseby	Advik, Hus J	T233	3750	150	Charcoal	N/A	70° 4'31.77"N	28°47'16.67"Ø	House J	House, unspecified		4150	3909	4524	3702	4127	Helskog 1980:53	Renouf 1989:114
Advik	Nesseby	AdvNm	Beta383561	3850	30	Charcoal	Deciduous	70° 4'31.77"N	28°47'16.67"Ø	House N	Midden		4382	4160	4407	4156	4270	Martens et al 2017
Advik	Nesseby	AdvNm	Beta383563	3830	30	Charcoal	Deciduous	70° 4'31.77"N	28°47'16.67"Ø	House N	Midden		4286	4155	4405	4101	4228	Martens et al 2017
Advik	Nesseby	AdvNm	Beta383560	3780	30	Charcoal	Deciduous/Heather	70° 4'31.77"N	28°47'16.67"Ø	House N	Midden		4229	4092	4245	4009	4154	Martens et al 2017
Advik	Nesseby	AdvNm	Beta383562	3760	30	Charcoal	Deciduous	70° 4'31.77"N	28°47'16.67"Ø	House N	Midden		4382	4085	4236	3993	4122	Martens et al 2017
Advik	Nesseby	AdvNm	Beta383559	3740	30	Charcoal	Deciduous	70° 4'31.77"N	28°47'16.67"Ø	House N	Midden		4137	4003	4150	3984	4096	Martens et al 2017
Advik	Nesseby	AdvNm	Beta383558	3710	30	Charcoal	Deciduous twig	70° 4'31.77"N	28°47'16.67"Ø	House N	Midden		4137	3986	4150	3973	4042	Martens et al 2017
Advik	Nesseby	AdvNm	Beta383557	3630	30	Charcoal	Deciduous twig	70° 4'31.77"N	28°47'16.67"Ø	House N	Midden		3979	3897	4076	3854	3941	Martens et al 2017
Advik	Nesseby	AdvNm	T2238	3620	190	Charcoal	Pine / birch	70° 4'31.77"N	28°47'16.67"Ø	House N	Midden		4227	3649	4506	3461	3957	Helskog 1980:53	Renouf 1989:114
Bergeby	Nesseby	Berg16	T9863	3435	105	Charcoal	N/A	70° 8'54.76"N	28°54'16.81"Ø	Tuft 16	Fireplace		3834	3575	3971	3451	3702	Schanche 1994
Bergeby	Nesseby	Berg18	TUa267	3690	85	Charcoal	Birch	70° 8'54.76"N	28°54'16.81"Ø	Tuft 18	Fireplace		4148	3906	4346	3733	4034	Schanche 1994. Johansen 1998
Bergeby	Nesseby	Berg18	TUa266	3665	95	Charcoal	Birch	70° 8'54.76"N	28°54'16.81"Ø	Tuft 18	Floor		4146	3868	4287	3716	4002	Schanche 1994. Johansen 1998
Bergeby	Nesseby	Berg18	T9869	3520	105	Charcoal	Birch	70° 8'54.76"N	28°54'16.81"Ø	Tuft 18	Midden		3960	3644	4140	3560	3803	Schanche 1994. Johansen 1998
Bergeby	Nesseby	Berg22	T9866	3710	180	Charcoal	N/A	70° 8'54.76"N	28°54'16.81"Ø	Tuft 22	Fireplace		4383	3835	4569	3583	4077	Schanche 1994
Bergeby	Nesseby	Berg23	T9865	3530	105	Charcoal	N/A	70° 8'54.76"N	28°54'16.81"Ø	Tuft 23	Fireplace		3965	3648	4141	3565	3817	Schanche 1994
Bergeby	Nesseby	Berg24	T9868	3400	150	Charcoal	N/A	70° 8'54.76"N	28°54'16.81"Ø	Tuft 24	Fireplace		3838	3475	4084	3276	3667	Schanche 1994
Bergeby	Nesseby	Berg27	T9864	3585	150	Charcoal	N/A	70° 8'54.76"N	28°54'16.81"Ø	Tuft 27	Fireplace		4090	3650	4385	3494	3901	Schanche 1994
Bergeby	Nesseby	Berg5	T9862	3395	155	Charcoal	N/A	70° 8'54.76"N	28°54'16.81"Ø	Tuft 5	Fireplace		3836	3463	4087	3265	3662	Schanche 1994
Bergeby	Nesseby	Berg9	T9867	3620	65	Charcoal	N/A	70° 8'54.76"N	28°54'16.81"Ø	Tuft 9	Fireplace		4070	3842	4145	3724	3937	Schanche 1994
Gressbakken NO	Nesseby	Gressbakken no21m	T2239	3600	80	Charcoal	Birch/pine	70° 4'29.46"N	28°49'15.79"Ø	House 21	Midden		4076	3733	4146	3694	3910	Schanche 1994:97; Helskog ???	Renouf 1989:114
Gressbakken NO	Nesseby	Gressbakken no21m	T2059	3550	70	Shell	Marine	70° 4'29.46"N	28°49'15.79"Ø	House 21	Midden		3958	3721	4075	3642	3840	Schanche 1994:97; Helskog ???	Renouf 1989:114
Gressbakken NO	Nesseby	Gressbakken no22m	T2475	3800	70	Charcoal	Birch	70° 4'29.46"N	28°49'15.79"Ø	House 22	Midden		4348	4085	4413	3986	4195	Schanche 1994:97; Helskog ???	Renouf 1989:114
Gressbakken NO	Nesseby	Gressbakken no22m	T2163	3640	80	Shell	Marine	70° 4'29.46"N	28°49'15.79"Ø	House 22	Midden		4084	3861	4224	3720	3964	Schanche 1994:97; Helskog ???	Renouf 1989:114
Gressbakken NO	Nesseby	Gressbakken no23m	T2060	3600	90	Charcoal	Pine	70° 4'29.46"N	28°49'15.79"Ø	House 23	Midden		4079	3730	4153	3645	3911	Schanche 1994:97; Helskog ???	Renouf 1989:114
Gressbakken NO	Nesseby	Gressbakken no23m	T2240	3550	40	Shell	Marine	70° 4'29.46"N	28°49'15.79"Ø	House 23	Midden		3898	3729	3965	3705	3842	Schanche 1994:97; Helskog ???	Renouf 1989:114
Gressbakken NO	Nesseby	Gressbakken no24m	T2164	3880	110	Charcoal	Heather	70° 4'29.46"N	28°49'15.79"Ø	House 24	Midden		4495	4102	4784	3975	4300	Schanche 1994:97; Helskog ???	Renouf 1989:114
Gressbakken NV	Nesseby	Gressbakken nv11m	T2162	3930	70	Bone/Antler	Seal	70° 4'29.46"N	28°49'15.79"Ø	House 11	Midden		4508	4249	4568	4151	4362	Schanche 1994:97; Helskog ???	Renouf 1989:114
Gressbakken NV	Nesseby	Gressbakken nv1m	T2161	3900	110	Bone/Antler	Seal	70° 4'29.46"N	28°49'15.79"Ø	House 1	Midden		4511	4155	4789	3984	4325	Schanche 1994:97; Helskog ???	Renouf 1989:114
Gressbakken NV	Nesseby	Gressbakken nv12m	T1918	3660	80	Shell	Marine	70° 4'29.46"N	28°49'15.79"Ø	House 12	Midden		4136	3880	4236	3728	3992	Schanche 1994:97; Helskog ???	Renouf 1989:114
Gressbakken NV	Nesseby	Gressbakken nv2m	T2476	3600	80	Shell	Marine	70° 4'29.46"N	28°49'15.79"Ø	House 2	Midden		4076	3733	4146	3694	3910	Schanche 1994:97; Helskog ???	Renouf 1989:114
Gressbakken NV	Nesseby	Gressbakken nv3m	T1917	4210	90	Shell	Marine	70° 4'29.46"N	28°49'15.79"Ø	House 3	Midden	Already MRC by lab. Probably using 440 marine offset						Schanche. Gressbakkentuftene. 97	Renouf 1989:114
Gressbakken NV	Nesseby	Gressbakken nv3m	T198	3650	150	Charcoal	N/A	70° 4'29.46"N	28°49'15.79"Ø	House 3	Midden	Schanche 1994:97 oppgir at konteksten er gulv, ikke mødding	4227	3726	4415	3614	3990	Schanche 1994:97; Helskog ???	Renouf 1989:114
Gressbakken NV	Nesseby	Gressbakken nv4m	T234	3850	100	Charcoal	N/A	70° 4'29.46"N	28°49'15.79"Ø	House 4	Midden		4415	4102	4525	3976	4261	Schanche 1994:97; Helskog ???	Renouf 1989:114
Gressbakken NV	Nesseby	Gressbakken nv9m	T1916	3750	70	Shell	Marine	70° 4'29.46"N	28°49'15.79"Ø	House 9	Midden		4233	3986	4400	3904	4116	Schanche 1994:97; Helskog ???	Renouf 1989:114
Iversfjord	Gamvik	Iversfjord, Hus 17	TUa1623	3880	60	Ceramic	Food crust	70°47'54.38"N	27°53'59.91"Ø	TS 7301 iio, House 17	Hustuft		4412	4241	4508	4098	4307	NTNU lab
Iversfjord	Gamvik	Iversfjord, Hus 17	T2771	3640	120	Charcoal	Birch	70°47'54.38"N	27°53'59.91"Ø	House 17 23x26y lag 3 prøve III	Midden		4150	3735	4378	3640	3971	Helskog 1983:53	Schanche 1994. Johnsen 1998.
Iversfjord	Gamvik	Iversfjord, Hus 17	T2348	3490	100	Charcoal	Birch	70°47'54.38"N	27°53'59.91"Ø	House 17 19x19y nivå 2	Floor		3889	3638	4076	3484	3767	Helskog 1983:53	Schanche 1994. Johnsen 1998.
Iversfjord	Gamvik	Iversfjord, Hus 17	T2486	3480	130	Charcoal	Birch	70°47'54.38"N	27°53'59.91"Ø	House 17 21x18y R5	Floor		3905	3580	4139	3449	3761	Helskog 1983:53	Schanche 1994. Johnsen 1998.
Iversfjord	Gamvik	Iversfjord, Hus 18	TUa1624	3805	80	Ceramic	Food crust	70°47'54.38"N	27°53'59.91"Ø	TS 5933 u, House 18	House, unspecified		4385	4085	4420	3979	4202	NTNU lab
Iversfjord	Gamvik	Iversfjord, Hus 18	T2772	3730	90	Charcoal	Birch	70°47'54.38"N	27°53'59.91"Ø	House 18 401x19y pose 3	Fireplace		4235	3931	4405	3862	4090	Helskog 1983:53	Schanche 1994. Johnsen 1998.
Iversfjord	Gamvik	Iversfjord, Hus 18	T2048	3100	70	Charcoal	Birch	70°47'54.38"N	27°53'59.91"Ø	House 18	Entrace		3384	3217	3458	3080	3300	Helskog 1983:53	Schanche 1994. Johnsen 1998.
Iversfjord	Gamvik	Iversfjord, Hus 19	T2049	2600	70	Charcoal	Birch	70°47'54.38"N	27°53'59.91"Ø	House 19	Entrance		2788	2505	2860	2465	2715	Helskog 1983:53	Schanche 1994
Iversfjord	Gamvik	Iversfjord, Hus 19	TUa1625	2580	90	Ceramic	Food crust	70°47'54.38"N	27°53'59.91"Ø	House 19	Ceramic from house assemblage	Not corrected for mar.res effect due to strong correspondence with assoviated terrestrial dates	2781	2493	2850	2378	2636	NTNU lab
Iversfjord	Gamvik	Iversfjord, Hus 19	T2050	2490	100	Charcoal	Birch	70°47'54.38"N	27°53'59.91"Ø	House 19	Entrance		2730	2460	2759	2346	2562	Helskog 1983:53	Schanche 1994
Iversfjord	Gamvik	Iversfjord, Hus 20	T2487	3590	70	Charcoal	Birch	70°47'54.38"N	27°53'59.91"Ø	House 20 19x20y B Ts 5938ty	Fireplace		4062	3732	4086	3701	3896	Helskog 1983:53	Schanche 1994. Johnsen 1998.
Iversfjord	Gamvik	Iversfjord, Hus 20	T2349	3560	100	Charcoal	Birch	70°47'54.38"N	27°53'59.91"Ø	House 20 16x20y, 16x21y	Fireplace		3977	3709	4146	3594	3857	Helskog 1983:53	Schanche 1994. Johnsen 1998.
Kalkillebukta	Sør-Varanger	Kal10	T9857	3565	100	Charcoal	N/A	69°44'20.44"N	29°40'51.40"Ø	House 10	Fireplace		3981	3712	4148	3610	3864	Schanche 1994:96; Helskog ???
Kalkillebukta	Sør-Varanger	Kal14	TUa402	3165	75	Charcoal	N/A	69°44'20.44"N	29°40'51.40"Ø	House 14	Fireplace		3469	3255	3565	3185	3385	Schanche 1994:96; Helskog ???
Kalkillebukta	Sør-Varanger	Kal17m	T9861	3655	50	Charcoal	N/A	69°44'20.44"N	29°40'51.40"Ø	House 17	Midden		4080	3901	4144	3845	3980	Schanche 1994:96; Helskog ???
Kalkillebukta	Sør-Varanger	Kal19	T9851	3350	170	Charcoal	N/A	69°44'20.44"N	29°40'51.40"Ø	House 19	Fireplace		3828	3400	4083	3181	3609	Schanche 1994:96; Helskog ???
Kalkillebukta	Sør-Varanger	Kal21	T9858	3415	155	Charcoal	N/A	69°44'20.44"N	29°40'51.40"Ø	House 21	Fireplace		3857	3478	4142	3344	3686	Schanche 1994:96; Helskog ???
Kalkillebukta	Sør-Varanger	Kal22	TUa403	3665	85	Charcoal	N/A	69°44'20.44"N	29°40'51.40"Ø	House 22	Fireplace		4143	3879	4243	3724	4000	Schanche 1994:96; Helskog ???
Kalkillebukta	Sør-Varanger	Kal3	T9852	3730	95	Charcoal	N/A	69°44'20.44"N	29°40'51.40"Ø	House 3	Fireplace		4236	3930	4406	3855	4092	Schanche 1994:96; Helskog ???
Kalkillebukta	Sør-Varanger	Kal6	T9853	3640	75	Charcoal	N/A	69°44'20.44"N	29°40'51.40"Ø	House 6	Fireplace		4083	3865	4220	3723	3964	Schanche 1994:96; Helskog ???
Kalkillebukta	Sør-Varanger	Kal7	TUa265	3765	80	Charcoal	Birch	69°44'20.44"N	29°40'51.40"Ø	House 7	Posthole		4245	3986	4410	3926	4140	Schanche 1994:96; Helskog ???
Kalkillebukta	Sør-Varanger	Kal7	T9848	3475	70	Charcoal	N/A	69°44'20.44"N	29°40'51.40"Ø	House 7	Fireplace		3835	3644	3920	3573	3749	Schanche 1994:96; Helskog ???
Kalkillebukta	Sør-Varanger	Kal7	T9860	3560	170	Charcoal	N/A	69°44'20.44"N	29°40'51.40"Ø	House 7	Midden		4087	3638	4400	3454	3872	Schanche 1994:96; Helskog ???
Kalkillebukta	Sør-Varanger	Kal9	T9856	3335	150	Charcoal	N/A	69°44'20.44"N	29°40'51.40"Ø	House 9	Fireplace		3819	3394	3975	3226	3588	Schanche 1994:96; Helskog ???
Karlebotnbakken	Sør-Varanger	Karlb	T7744	3640	140	Charcoal	Birch/Pine	70° 7'23.30"N	28°34'32.21"Ø	House 6	Floor		4154	3725	4407	3636	3974	Johansen 1998
Karlebotnbakken	Sør-Varanger	Karlb	T7743	3390	110	Charcoal	Birch/Willow/Populus	70° 7'23.30"N	28°34'32.21"Ø	House 6	Fireplace		3823	3483	3906	3385	3647	Johansen 1998
Laksjohka	Tana	LaksjohkaH3	TUa6374	3665	40	N/A		70° 4'32.10"N	27°28'48.87"Ø									Skandfer: LARM kap 9
Laksjohka	Tana	LaksjohkaH3	TUa7136	3325	35	N/A		70° 4'32.10"N	27°28'48.87"Ø									Skandfer: LARM kap 9
Leirpollen (Ifjord)	Lebesby	LeirM5	T7581	3510	80	Charcoal	N/A	70°27'54.32"N	27° 5'59.57"Ø	House 5	Midden		3889	3650	3985	3579	3786	NTNU lab	Schanche 1994; Schanche. Gressbakkentuftene. S.98
Leirpollen (Ifjord)	Lebesby	LeirH1	T6519	1500	190	Charcoal	Furu	70°27'54.32"N	27° 5'59.57"Ø	House 1	Fireplace
Leirpollen (Ifjord)	Lebesby	LeirH2	T6520	3810	120	Charcoal	Pine	70°27'54.32"N	27° 5'59.57"Ø	House 2	Fireplace		4409	4011	4525	3872	4207	Andreassen 1988
Leirpollen (Ifjord)	Lebesby	LeirH2	T6521	1030	50	Charcoal	Bjørk	70°27'54.32"N	27° 5'59.57"Ø	House 2	House, unspecified
Nyelv	Nesseby	NyelvH11	Beta457846	3820	30	Charcoal	Birch	70° 4'20.47"N	28°50'33.88"Ø	House 11	Wall		4248	4152	4397	4093	4208	Niemi and oppvang 2018
Nyelv	Nesseby	NyelvH11	Beta457841	3780	30	Charcoal	Conifer	70° 4'20.47"N	28°50'33.88"Ø	House 11	Floor		4229	4092	4245	4009	4154	Niemi and oppvang 2018
Nyelv	Nesseby	NyelvH11	Beta457840	3670	30	Charcoal	Conifer	70° 4'20.47"N	28°50'33.88"Ø	House 11	Entrance, possibly outside structure		4081	3930	4088	3906	4005	Niemi and oppvang 2018
Nyelv	Nesseby	NyelvH11	Beta457842	3670	30	Charcoal	Conifer	70° 4'20.47"N	28°50'33.88"Ø	House 11	Fireplace/floot		4081	3930	4088	3906	4005	Niemi and oppvang 2018
Nyelv	Nesseby	NyelvH11	Beta457845	3660	30	Charcoal	Birch	70° 4'20.47"N	28°50'33.88"Ø	House 11	Wall		4077	3926	4085	3899	3984	Niemi and oppvang 2018
Nyelv	Nesseby	NyelvH11	Beta457843	3580	30	Charcoal	Conifer	70° 4'20.47"N	28°50'33.88"Ø	House 11	Floot		3914	3838	3977	3777	3882	Niemi and oppvang 2018
Nyelv	Nesseby	NyelvH11	Beta448381	3370	30	Charcoal	N/A	70° 4'20.47"N	28°50'33.88"Ø	House 11	Fireplace/floot		3640	3574	3694	3515	3613	Niemi and oppvang 2018
Nyelv	Nesseby	NyelvH9	B457849	3880	30	Charcoal	Conifer	70° 4'20.47"N	28°50'33.88"Ø	House 9	Entrance		4404	4257	4416	4185	4324	Niemi and oppvang 2018
Nyelv	Nesseby	NyelvH9	B457850	3720	30	Charcoal	Deciduous	70° 4'20.47"N	28°50'33.88"Ø	House 9	Wall		4143	3990	4150	3980	4055	Niemi and oppvang 2018
Nyelv	Nesseby	NyelvH9	B457853	3560	30	Charcoal	Birch	70° 4'20.47"N	28°50'33.88"Ø	House 9	Wall		3902	3829	3965	3724	3859	Niemi and oppvang 2018
Nyelv	Nesseby	NyelvH9	B457851	3440	30	Charcoal	Deciduous	70° 4'20.47"N	28°50'33.88"Ø	House 9	Floor/wall transition		3811	3640	3827	3613	3695	Niemi and oppvang 2018
Nyelv	Nesseby	NyelvH9	B457852	3270	30	Charcoal	Birch	70° 4'20.47"N	28°50'33.88"Ø	House 9	Floor		3557	3455	3572	3409	3501	Niemi and oppvang 2018
Sandbukt	Hammerfest	SandbuktH42	Beta107395	3230	60	Charcoal	N/A	70°41'4.87"N	23°13'7.65"Ø	House 42			3555	3384	3607	3344	3457	Johansen 1998:appendix 3	T.K. Gamst pers.medd.
Skarvbergvika	Porsanger	SkarvbergvikaH2	Beta460403	3710	30	Charcoal	Birch	70°37'38.14"N	25°20'0.11"Ø	House 2	Fireplace, northern		4137	3986	4150	3973	4042	Oppvang et al. 2018
Skarvbergvika	Porsanger	SkarvbergvikaH2	Beta460406	3600	30	Charcoal	Birch	70°37'38.14"N	25°20'0.11"Ø	House 2	Floor, northern		3965	3862	3980	3837	3906	Oppvang et al. 2018
Skarvbergvika	Porsanger	SkarvbergvikaH2	Beta460405	3570	30	Charcoal	Birch	70°37'38.14"N	25°20'0.11"Ø	House 2	Floor/fireplace, southern		3905	3833	3971	3730	3871	Oppvang et al. 2018
Skarvbergvika	Porsanger	SkarvbergvikaH2	Beta460401	3510	30	Charcoal	Birch	70°37'38.14"N	25°20'0.11"Ø	House 2	Floor		3836	3723	3867	3697	3777	Oppvang et al. 2018
Skarvbergvika	Porsanger	SkarvbergvikaH2	Beta460400	3490	30	Charcoal	Birch	70°37'38.14"N	25°20'0.11"Ø	House 2	Fireplace, northern		3827	3718	3842	3649	3765	Oppvang et al. 2018
Skarvbergvika	Porsanger	SkarvbergvikaH2	Beta460409	3470	30	Charcoal	Birch	70°37'38.14"N	25°20'0.11"Ø	House 2	Floor		3826	3693	3833	3644	3749	Oppvang et al. 2018
Skarvbergvika	Porsanger	SkarvbergvikaH2	Beta460402	3460	30	Charcoal	Birch	70°37'38.14"N	25°20'0.11"Ø	House 2	Floor, northern		3823	3647	3830	3641	3728	Oppvang et al. 2018
Skarvbergvika	Porsanger	SkarvbergvikaH2	Beta460404	3450	30	Charcoal	Birch	70°37'38.14"N	25°20'0.11"Ø	House 2	Floor/fireplace, southern		3820	3643	3829	3637	3711	Oppvang et al. 2018
Storsteinneset	Passvik	StorsteinnesetH1	TUa5043	3370	40	Charcoal		69°14'44.56"N	29°13'18.57"Ø									Skandfer: LARM kap 9
Storsteinneset	Passvik	StorsteinnesetH3	TUa5040	3100	40	Charcoal		69°14'44.56"N	29°13'18.57"Ø									Skandfer: LARM kap 9
Tollevika	Alta	Tollevika, AreaC	Wk16113	3747	92	Charcoal	N/A	69°58'44.83"N	23°15'35.70"Ø	C18, area C	Fireplace	The dated contexts (structureID) referes to structural elements of the same house	4245	3972	4410	3889	4116	Bell 2004
Tollevika	Alta	Tollevika, AreaC	Wk16116	3700	40	Charcoal	N/A	69°58'44.83"N	23°15'35.70"Ø	C19, area C	Midden	The dated contexts (structureID) referes to structural elements of the same house	4090	3980	4152	3921	4038	Bell 2004
Tollevika	Alta	Tollevika, AreaC	Wk16114	3638	55	Charcoal	N/A	69°58'44.83"N	23°15'35.70"Ø	C3, area C	Fireplace	The dated contexts (structureID) referes to structural elements of the same house	4075	3880	4145	3831	3958	Bell 2004
Tollevika	Alta	Tollevika, AreaC	Wk16115	3546	40	Charcoal	N/A	69°58'44.83"N	23°15'35.70"Ø	C10, area C	Floor	The dated contexts (structureID) referes to structural elements of the same house	3895	3728	3961	3707	3836	Bell 2004
Tollevika	Alta	Tollevika, AreaC	Wk16112	2343	36	Charcoal	N/A	69°58'44.83"N	23°15'35.70"Ø	C12, area C	Fireplace	The dated contexts (structureID) referes to structural elements of the same house	2423	2327	2487	2214	2356	Bell 2004
Torhop	Tana	Torhop	T7578	3530	150	Charcoal	N/A	70°28'42.83"N	27°59'23.58"Ø		House, unspecified		4067	3614	4237	3454	3828	K.Helskog unpublished?	Trondheim lab
Torhop	Tana	Torhop	T1837	3530	50	Charcoal	N/A	70°28'42.83"N	27°59'23.58"Ø		Midden		3881	3721	3965	3648	3804	K.Helskog unpublished?	Trondheim lab
Tverrnes	Porsanger	TverrnesH10	T10431	3365	110	Charcoal	Birch	70°18'52.28"N	25° 3'32.07"Ø	House 10	Fireplace		3809	3460	3887	3376	3616	NTNU lab	Schanche 1994; Schanche. Gressbakkentuftene. S.98
Tverrnes	Porsanger	TverrnesH7	TUa525	3665	60	Charcoal	Birch	70°18'52.28"N	25° 3'32.07"Ø	House 7	House, unspecified		4084	3910	4152	3840	3996	NTNU lab	Schanche 1994; Schanche. Gressbakkentuftene. S.98
Valen	Sør-Varanger	ValenH4	T4348	3480	190	Charcoal	N/A	69°53'16.36"N	29°24'13.89"Ø	House 4	Fireplace		4060	3484	4380	3274	3775	Schanche 1994:98

## Sheet: Interior Radiocarbon Data
SiteID	Labcode	C14Age	C14Error
Mantalguoika	Tra416	1515	35
Kristines plass	Tua6394	1615	25
Jeagelnjarga	Tra422	1735	35
Njalbme A1	Beta361359	1800	30
Storsteinneset	TUa5470	1835	35
Lappeluoppal	OKR15510F6	1905	100
Virdnejavri 112	T6857	1950	70
Coallejavri	Ua45145	1977	30
Guovzadievva	Tra419	2050	35
Coallejavri	Ua45141	2053	30
Virdnejavri 106	T6849	2070	80
Cavco	T7372	2080	80
Markansguoika	Tra418	2095	35
Gausvik	Beta422009	2110	30
Fosslund at Skogfoss	TUa2889	2115	75
Guovzadievva	Ua45147	2134	30
Halkavarri PS332	Wk20176	2154	71
Markansguoika	Tra417	2160	35
Storsteinneset	TUa2888	2170	70
Storsteinneset Tuft 1	TUa5042	2180	35
Stryket 1	T17375	2180	110
Stryket 10	T16690	2205	60
Habatguoikka	T6149	2210	90
Melkefoss	TUa6276	2210	35
Cavco	T7370	2220	60
Cavco	T7368	2230	80
Virdnejavri 106	T6854	2260	140
Stryket 1	Tua5640	2285	35
Fosslund	T15073	2295	85
Noatunneset	TUa5473	2300	35
Virdnejavri 106	T6851	2310	140
Habatguoikka	Tua7195	2340	25
Virdnejavri 106	T6848	2350	150
Jerguljohka R284	Ua45151	2364	30
Njalbme A2	Beta361360	2370	30
Leinavasshytta 4	Tra503	2390	30
Leinavasshytta 4	Tra1983	2420	35
Leinavasshytta 4	Tra1982	2430	35
Laksjohka	Tua7137	2435	35
Stryket 10	T19589	2470	65
Virdnejávri 106	Poz76521	2480	30
Inganeset	T15072	2500	60
Stryket 1	Tua5641	2505	30
Holmfoss	T237	2550	150
Coallejavri	Ua45142	2588	30
Halkavarri PS65	Wk18736	2682	86
Coallejavri	Ua45143	2696	30
Virdnejavri 106	T6855	2750	130
Njallajavri	Tua7196	2805	25
Kautokeinoelva	T4283	2860	90
Njalbme B	Beta361361	2860	30
Virdnejavri 106	T6853	2880	70
Cavco	T7371	2970	130
St. Rosta	T20064	2990	85
Stryket 10	Tua18836	3040	75
Virdnejávri 106	Ua50248	3073	34
Gasadaknes	T6473	3080	170
Jiesjavrre (Gasadaknes)	T2880	3100	80
Storsteinneset Tuft 3	TUa5040	3100	40
Stryket 10	Tua7356	3115	40
Cavco	T7373	3190	90
Vuolit Mollesjohka R8K2	Tra2113	3245	40
Jiesjavrre (Gasadaknes)	T1814	3280	120
Guovzadievva	Ua45146	3298	30
Virdnejavri 112	T6861	3300	120
Laksjohka	Tua7136	3325	35
Halkavarri PS366	Wk20177	3343	68
Coallejavri	Ua45144	3345	30
Leina	TUa6395	3345	30
Kautokeinoelva I	T19461	3350	60
Ceaggo	Beta361349	3360	30
Gasadaknes	T6471	3360	150
Kautokeinoelva	T4284	3370	150
Leina	TUa6396	3370	30
Storsteinneset Tuft 1	TUa5043	3370	40
Virdnejavri 106	T6856	3420	190
Virdnejavri 112	T7386	3430	70
Virdnejavri 112	T7387	3430	60
Halkavarri PS88	Wk18737	3435	34
JergulR18	Beta361357	3460	30
Virdnejavri 112	T6859	3490	80
Virdnejavri 106	T6850	3520	160
Coallejavri	Tua7498	3575	40
Gozejohka R7	Ua45148	3613	30
Melkefoss	T2003	3640	180
Nesheim	T15847	3650	80
Virdnejavri 112	T6860	3650	60
Laksjohka	TUa6374	3665	40
Kautokeino kirkested	OKR45510Q4	3895	160
Kautokeino kirkested	T9461	3895	160
Sarajaakka	TUa3471II	3905	40
Virdnejavri 112	T6858	4080	140
Halkavarri PS241	Wk20174	4095	42
Jiesjavrre (Gasadaknes)	T1815	4130	230
Almenningen 1	TUa5018	4220	40
Kautokeinoelva	T4285	4260	100
Halkavarri PS1	Wk18734	4266	34
Fredrik Antiplassen	TUa5471	4300	35
Storsteinneset Tuft 3	TUa5041	4365	35
Lahpoluoppal	Tra420	4405	30
Cavco	T7374	4500	180
Almenningen 1	TUa5017	4505	40
Sarasjaakka1	Tua3470	4510	60
Halkavarri PS237	Wk20173	4520	69
MollesR28	Beta361358	4630	30
Halkavarri PS269	Wk20175	4673	83
Sarasjaakka2	Tua3471	4695	85
Salte4R5	Beta361363	4720	30
Skuvllajavri 2	Tua7217	4735	30
Halkavarri PS2	Wk18735	4784	33
Inganeset	TUa2886	4815	65
Jergul B	Beta361356	4980	30
Stryket 7	Wk22488	5172	45
Virdnejavri 24	Beta58655	5260	250
Melkefoss	T2471	5430	90
Noatun Innmarken (Inganeset)	Tua2887	5515	65
Almenningen 1	T17376	5555	65
Mennikka (Skogfoss) (Inganeset)	TUa3022	5795	55
Noatun Innmarken (Inganeset)	Tua3029	5850	55
Gravholmen	T238	5950	300
Noatun Neset	Beta131296	5950	90
Mennikka (Skogfoss) (Inganeset)	Tua3027	5975	60
Noatun Neset Vest	Tua3026	6030	70
Gravholmen	TUa5472	6095	45
Halkavarri PS209	Wk20172	6157	73
Almenningen 1	T17379	6160	100
Halkavarri PS3	Wk18738	6163	33
Noatun Innmarken (Inganeset)	Tua3023	6185	65
Juntavadda	TRa424	6195	35
Virdnejavri 111	Beta58656	6250	80
Jeagelnjarga	TRa423	6345	35
Almenningen 1	T17377	6360	105
Virdnejavri 9	T6865	6520	130
Devdisvatn	T1343	6570	150
Aksujavri	Tua7194	6650	30
Almenningen 1	TUa5019	6920	40
Cudejoganjalbmi	Beta375243	6920	30
Cudejoganjalbmi	Beta375242	6970	30
Cudejoganjalbmi	Beta375241	7080	30
Buolzajavri Nord3	TRa3322	7180	55
Almenningen 1	Tua3538	7260	90
Virdnejavri 101	Tua7192	7880	35
Virdnejavri 113	Tua7193	8295	35
Virdnejavri 113	V26A	8670	52
Virdnejavri 26A	Ua46463	8670	52
